# Supplementary material for: Effects of both cold and heat stresses on the liver of giant spiny frog Quasipaa spinosa: stress response and histological changes
Source: Oxford University Press journal article supplement (doi:10.1242/jeb.186379), 2018-01-01
Supplement: jeb186379supp.pdf [file jeb186379supp.pdf]

**Table S1. The sequences of primers in this experiment.**

| Target gene                     | Primer sequence (5'-3')                                           |
|---------------------------------|-------------------------------------------------------------------|
| <i>Hsp10</i>                    | F: CTCCCTTTATTTGACCGTGTCTTGT<br>R: CTTAGAGCCTTCTCCGACTGCTACTA     |
| <i>Hsp30</i>                    | F: GAGGACGGAAGGAAGGAGACTGAT<br>R: TTGGACATGGAGCACAGCACATC         |
| <i>Hsp40</i>                    | F: CGTGAACGCCTCTGTTGAGATGG<br>R: TACCGATGCTTGAGAGCCTCCTAC         |
| <i>Hsp47</i>                    | F: AGTAGAGAAACTCCTGACCAGAGAACA<br>R: CGTGGCTGACTTCCATGCTGATT      |
| <i>Hsp60</i>                    | F: GTTGGTCTTCAGGTAGTTGCTGTCAA<br>R: ACCTCTCCCACCTTTCCAAAGTCAT     |
| <i>Hsp70</i>                    | F: ACCTCGGCACTACCTACTCCTGT<br>R: CACCTGGTTCTTGGCAGCATCTC          |
| <i>Grp78</i>                    | F: ACTGCTGCTGCCATTGCCTATG<br>R: GCTGGTCAAAGTCTTCGCCTCC            |
| <i>Hsp90</i>                    | F: GCCTGGAGCTTCTGAAGATGA<br>R: GCGGTTTGAGACGGTTACCTTT             |
| <i>Grp94</i>                    | F: GGCACAAGCATAACCAGACAGGA<br>R: GACCGTAACGTGGCAGTCTCAA           |
| <i>Hsp110</i>                   | F: TCCATCCCTTATCCACAGCCTCAG<br>R: CCTCCACCTCTATCTTCTCTACCACAG     |
| <i>SOD1</i>                     | F: ACTGCTGTGCGTCCGATGATG<br>R: GGCGATAAACAATAATGGCTGCGTAA         |
| <i>SOD2</i>                     | F: GGTAGACCAAGGACGGACTGTCATAT<br>R: GGAACATCCCAACGCAGGAACAA       |
| <i>SOD3</i>                     | F: GAGGTGCTGCTGAATCTTGCCATA<br>R: TCAGTCTTCAAGAGCAATTCACATCCA     |
| <i>CAT</i>                      | F: TGGACGGATCATTGAGGAGGAGAC<br>R: ACAAGAAGAGAACGATCAAGACCTACAC    |
| <i>GPx</i>                      | F: GACCAATCACAGAGCCTCCTACAGA<br>R: CCGCTTCGAGACCATCAACATCC        |
| <i>Bax</i>                      | F: TGGAGTCTTCTTAGCTGGCGTTCT<br>R: TTGTCAGTGCTGGAGTGAATTGGAAT      |
| <i>Bcl-2</i>                    | F: ACGGCAATACTTAGGATGGTCTTGATG<br>R: GTTGGATGGATGACTGACTATCTGAACA |
| <i>Caspase-3</i>                | F: GCGTAATGGAACTGATGTAGATGCCTTA<br>R: GTAGCCTTCCTCACCGTGACTCA     |
| <i>Caspase-8</i>                | F: ATCCAATACTCAGCCAGAGAAGCA<br>R: GTCGTTCTTGTTTCATCCTAGCCTGTT     |
| <i>Caspase-9</i>                | F: GACTGCTGCCTTATCATCATCCTCTC<br>R: GTGACCGTTGAACAAGTTGACGATTC    |
| <i><math>\beta</math>-Actin</i> | F: CCATGACAATAACCAGTGGTACGACC<br>R: ATGATATGGAGAAGATCTGGCATCA     |

**Table S2. Histological lesions in the liver of *Q. spinosa* under the cold (5 °C) and heat (30 °C) stresses for 12 h and 48 h.**

| Histological lesions                 | Control | Cold stress |         | Heat stress |        |
|--------------------------------------|---------|-------------|---------|-------------|--------|
|                                      |         | 12 h        | 48 h    | 12 h        | 48 h   |
| Congestion                           | 0       | 2           | 3       | 1           | 3      |
| Enlargement of sinusoids             | 0       | 0           | 2       | 0           | 1      |
| Inflammatory cell infiltration       | 0       | 2           | 3       | 0           | 0      |
| Hemorrhage                           | 0       | 3           | 1       | 3           | 1      |
| Number of melanomacrophages          | 1       | 2           | 0       | 3           | 0      |
| Percentage of melanomacrophages area | 6.59 ±  | 8.63 ±      | 0.62 ±  | 26.44 ±     | 2.85 ± |
|                                      | 0.22    | 0.18*       | 0.12*** | 0.58***     | 0.16** |

Note: Lesions were scored according to their severity (0: none; 1: mild; 2: moderate; and 3: severe). Data (percentage of melanomacrophages area) were shown as mean ± SD (n = 6, \* P < 0.05 and \*\* P < 0.01 as compared with control group).
